# Supplementary material
Source: Springer Nature journal article supplement (https://www.springermedizin.de/resource/supplementary/12916_2010_286_MOESM7_ESM.pdf/9599556)

**A****Unconjugated biologically-active Androgens**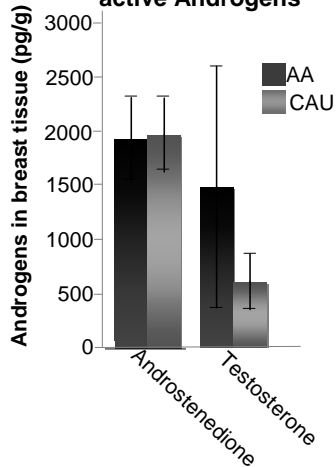**B****Unconjugated biologically-active Estrogens**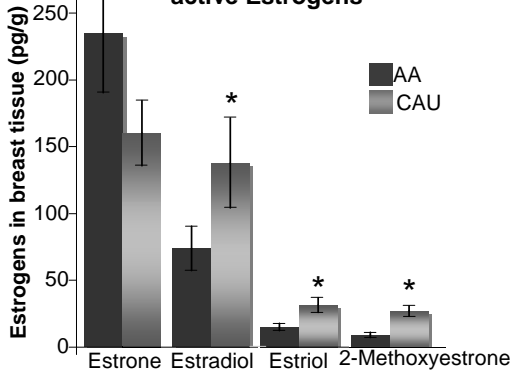

Supplement: MOESM7 [file 9599556]
